# Supplementary material for: Assessment of physical activity in older Belgian adults: validity and reliability of an adapted interview version of the long International Physical Activity Questionnaire (IPAQ-L)
Source: Springer Nature journal article supplement (doi:10.1186/s12889-015-1785-3), 2015-04-27
Supplement: MOESM1 [file 9749394]

## Supplementary File 1. Overview of older-adults-specific adaptations made to the IPAQ-L items

| MODIFIED ITEM IPAQ-L FOR OLDER ADULTS (≥65y)                                                                                                                                                            | ORIGINAL ITEM IPAQ-L ADULTS (15-65y)                                                                                                                                                                                                                                  |
|---------------------------------------------------------------------------------------------------------------------------------------------------------------------------------------------------------|-----------------------------------------------------------------------------------------------------------------------------------------------------------------------------------------------------------------------------------------------------------------------|
| <b>Domain: WORK-RELATED PA</b>                                                                                                                                                                          |                                                                                                                                                                                                                                                                       |
| During the last 7 days, on how many days did you do <i>moderate-to-vigorous</i> physical activities <i>as part of your work</i> ?                                                                       | During the last 7 days, on how many days did you do <i>vigorous</i> physical activities <i>as part of your work</i> ? / During the last 7 days, on how many days did you do <i>moderate</i> physical activities <i>as part of your work</i> ?                         |
| How much time did you usually spend on one of those days doing <i>moderate-to-vigorous</i> physical activities <i>as part of your work</i> ?                                                            | How much time did you usually spend on one of those days doing <i>vigorous</i> physical activities <i>as part of your work</i> ? / How much time did you usually spend on one of those days doing <i>moderate</i> physical activities <i>as part of your work</i> ?   |
| If you have walked <i>as part of your work</i> during the last 7 days, how would you describe your <i>walking speed</i> ? [1] high <sup>a</sup> ; [2] moderate <sup>b</sup> ; [3] low <sup>c</sup>      | Not specified                                                                                                                                                                                                                                                         |
| <b>Domain: TRANSPORTATION PA</b>                                                                                                                                                                        |                                                                                                                                                                                                                                                                       |
| If you have walked <i>to go from place to place</i> during the last 7 days, how would you describe your <i>walking speed</i> ? [1] high <sup>a</sup> ; [2] moderate <sup>b</sup> ; [3] low <sup>c</sup> | Not specified                                                                                                                                                                                                                                                         |
| <b>Domain: DOMESTIC PA</b>                                                                                                                                                                              |                                                                                                                                                                                                                                                                       |
| During the last 7 days, on how many days did you do <i>moderate-to-vigorous</i> physical activities <i>in the garden or yard</i> ?                                                                      | During the last 7 days, on how many days did you do <i>vigorous</i> physical activities <i>in the garden or yard</i> ? / During the last 7 days, on how many days did you do <i>moderate</i> activities <i>in the garden or yard</i> ?                                |
| How much time did you usually spend on one of those days doing <i>moderate-to-vigorous</i> physical activities <i>in the garden or yard</i> ?                                                           | How much time did you usually spend on one of those days doing <i>vigorous</i> physical activities <i>in the garden or yard</i> ? / How much time did you usually spend on one of those days doing <i>moderate</i> physical activities <i>in the garden or yard</i> ? |
| <b>Domain: RECREATIONAL PA</b>                                                                                                                                                                          |                                                                                                                                                                                                                                                                       |
| If you have walked in your <i>leisure time</i> during the last 7 days, how would you describe your <i>walking speed</i> ? [1] high <sup>a</sup> ; [2] moderate <sup>b</sup> ; [3] low <sup>c</sup>      | Not specified                                                                                                                                                                                                                                                         |
| Not counting any bicycling you have already mentioned, during the last 7 days, on how many days did you <i>bicycle</i> for at least 10 minutes at a time <i>in your leisure time</i> ?                  | Not specified                                                                                                                                                                                                                                                         |
| During the last 7 days, on how many days did you do <i>moderate-to-vigorous</i> physical activities <i>in your leisure time</i> ?                                                                       | During the last 7 days, on how many days did you do <i>vigorous</i> physical activities <i>in your leisure time</i> ? / During the last 7 days, on how many days did you do <i>moderate</i> physical activities <i>in your leisure time</i> ?                         |
| How much time did you usually spend on one of those days doing <i>moderate-to-vigorous</i> physical activities <i>in your leisure time</i> ?                                                            | How much time did you usually spend on one of those days doing <i>vigorous</i> physical activities <i>in your leisure time</i> ? / How much time did you usually spend on one of those days doing <i>moderate</i> physical activities <i>in your leisure time</i> ?   |

PA=physical activity

<sup>a</sup>walking fast, almost running; <sup>b</sup>walking briskly; <sup>c</sup>strolling
