# Supplementary material for: Assessment of physical activity in older Belgian adults: validity and reliability of an adapted interview version of the long International Physical Activity Questionnaire (IPAQ-L)
Source: Springer Nature journal article supplement (doi:10.1186/s12889-015-1785-3), 2015-04-27
Supplement: MOESM2 [file 9749394]

Supplementary File 2. Domain-specific content of the last 7 days IPAQ-L, adapted for Belgian older adults

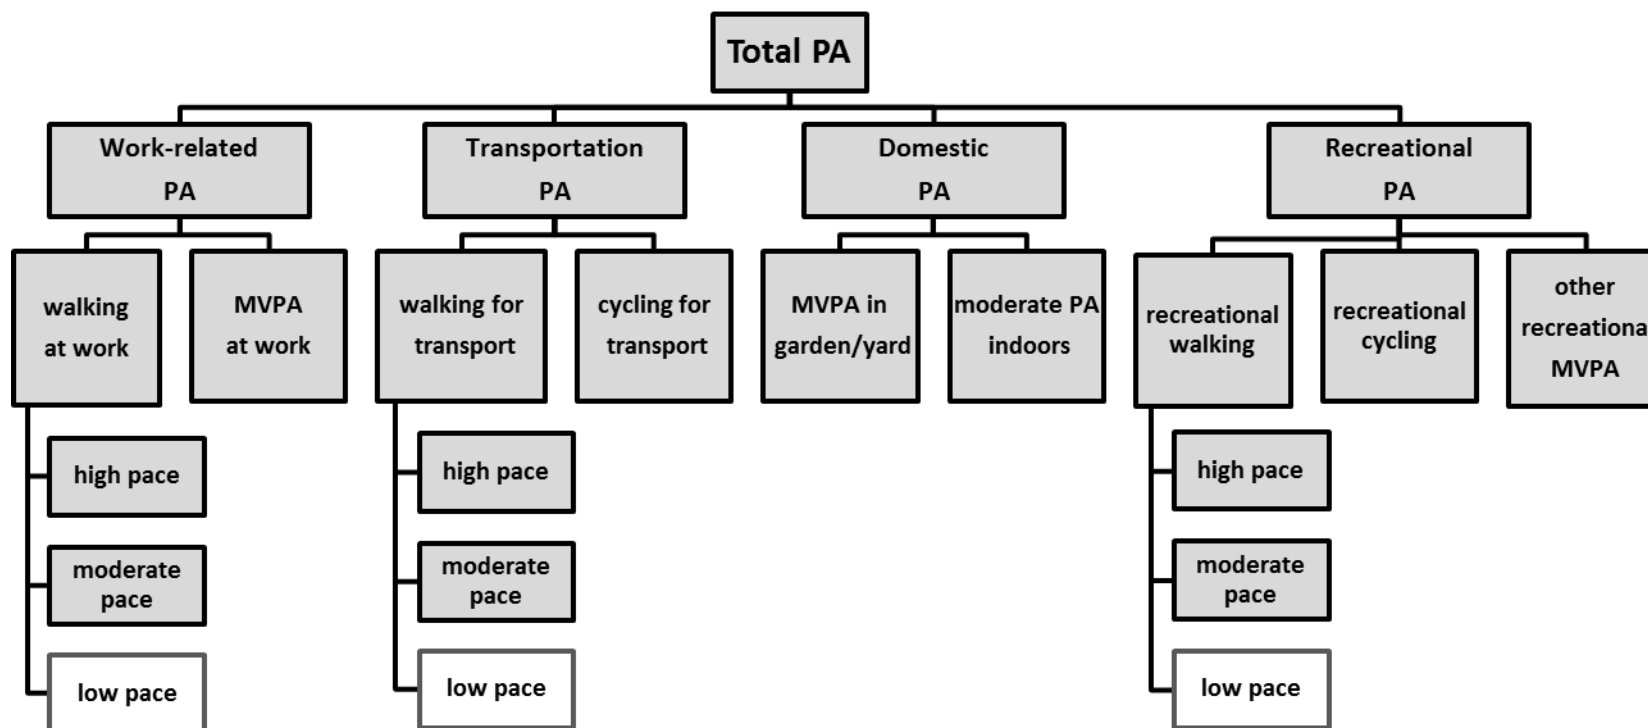

PA= physical activity; MVPA= moderate-to-vigorous physical activity

Grey boxes represent total MVPA
