# Supplementary material for: Assessment of physical activity in older Belgian adults: validity and reliability of an adapted interview version of the long International Physical Activity Questionnaire (IPAQ-L)
Source: Springer Nature journal article supplement (doi:10.1186/s12889-015-1785-3), 2015-04-27

Supplementary File 3. Difference between self-reported total PA and Freedson total PA (y-axis; expressed in terms of percentage) for each quartile of Freedson total PA (x-axis)

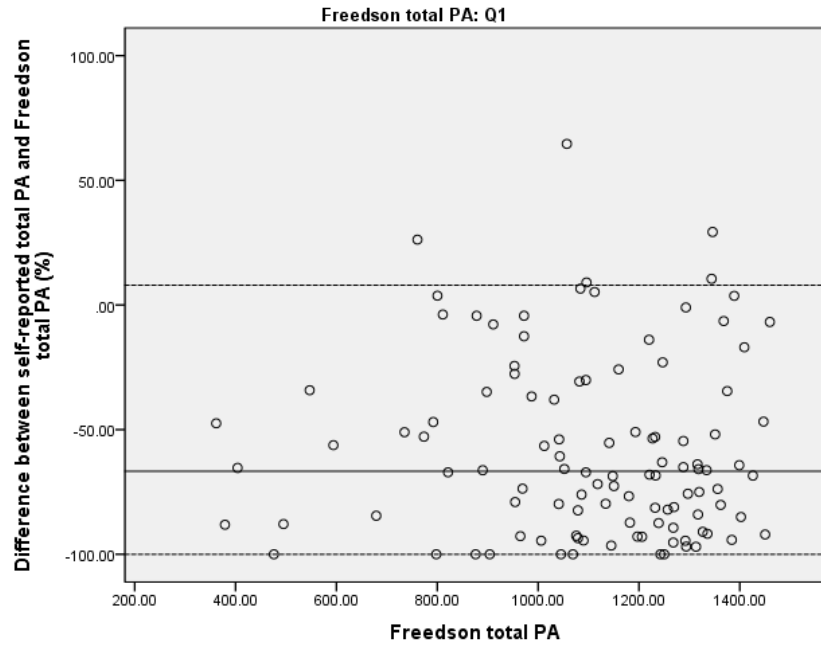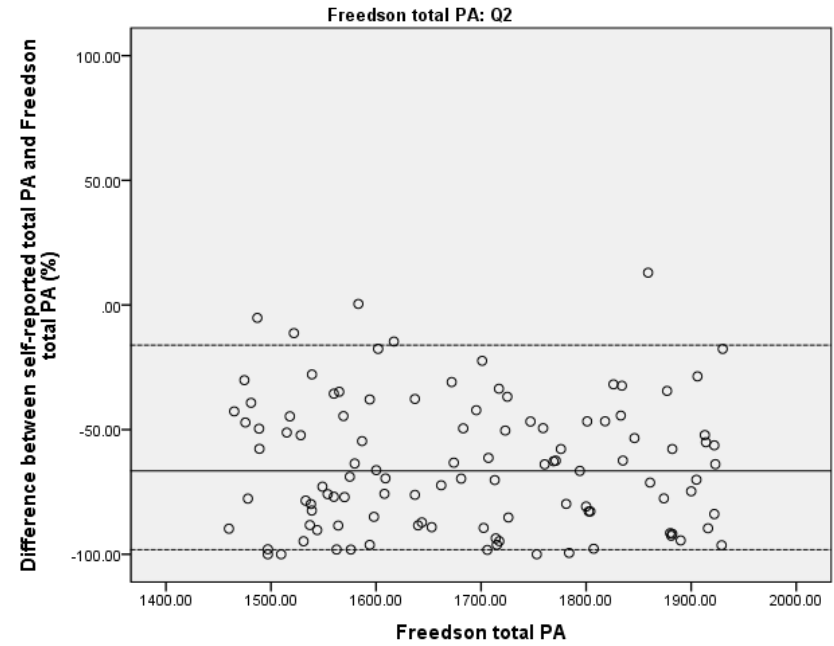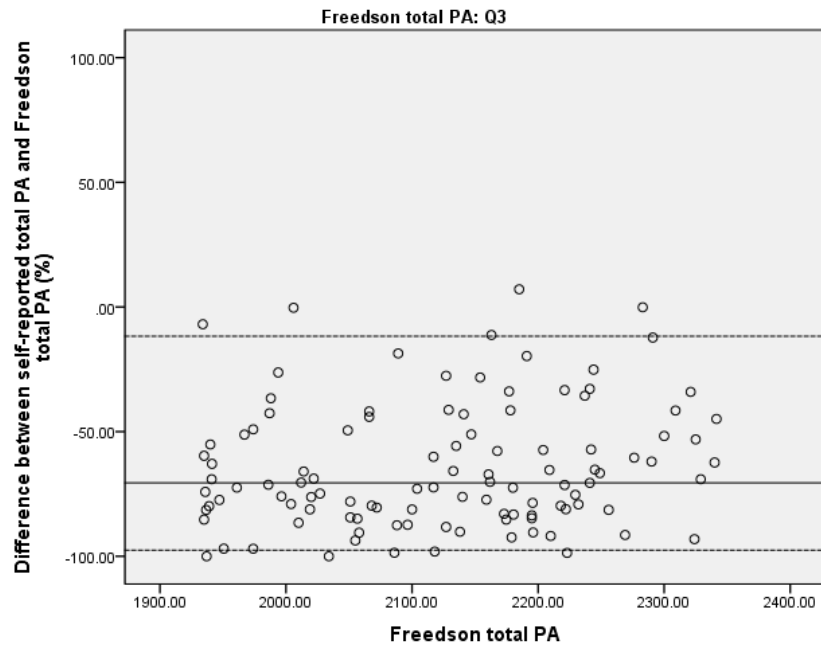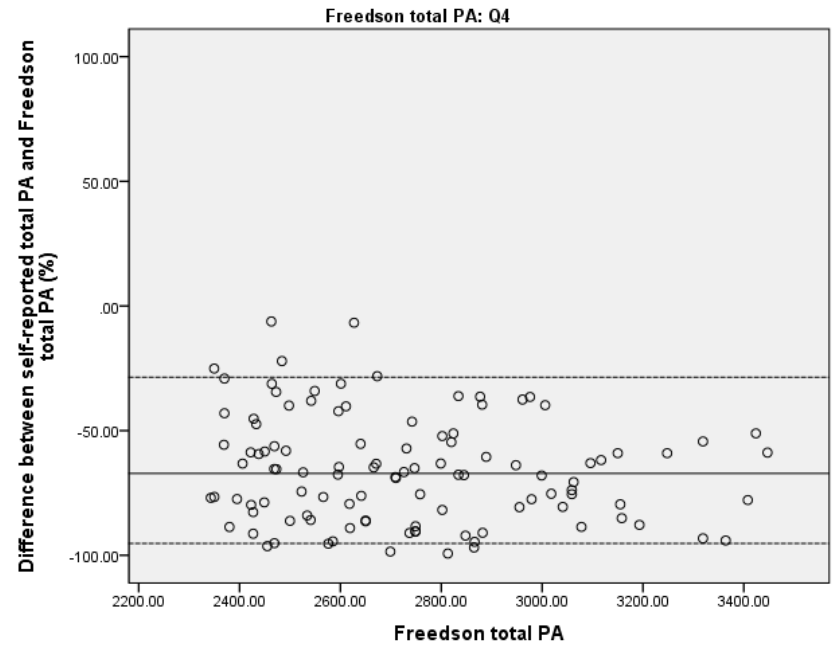

Supplement: MOESM3 [file 9749394]
